# Supplementary material for: Understanding the Response of Nitrifying Communities to Disturbance in the McMurdo Dry Valleys, Antarctica
Source: PubMed Central journal article supplement (PMC7143839; doi:10.3390/microorganisms8030404), 2020-03-13
Supplement: microorganisms-08-00404-s001.pdf [file microorganisms-08-00404-s001.pdf]

# Understanding the response of nitrifying communities to disturbance in the McMurdo Dry Valleys, Antarctica

Maria Monteiro<sup>1,2</sup>, Mafalda S. Baptista<sup>2,3,6</sup>, Joana Séneca<sup>3</sup>, Luís Torgo<sup>4,5,6</sup>, Charles K. Lee<sup>1,2</sup>, S. Craig Cary<sup>1,2</sup>, Catarina Magalhães<sup>1,3,6,7,\*</sup>

- <sup>1</sup> School of Science, University of Waikato, Hamilton, New Zealand
- <sup>2</sup> International Centre for Terrestrial Antarctic Research, University of Waikato, Hamilton, New Zealand
- <sup>3</sup> Interdisciplinary Centre of Marine and Environmental Research (CIIMAR/CIMAR), University of Porto, Portugal
- <sup>4</sup> LIAAD-INESC Porto LA, R. Ceuta 118 - 6., 4050-190 Porto, Portugal
- <sup>5</sup> Faculty of Computer Science, Dalhousie University, 6050 University Av., Halifax NS, N3H 1W5, Canada
- <sup>6</sup> Faculty of Sciences, University of Porto, Porto, Portugal
- <sup>7</sup> Ocean Frontier Institute, Dalhousie University, Canada

\* Correspondence: cmagalhaes@ciimar.up.pt (CM)

Received: 17 February 2020; Accepted: 10 March 2020; Published: 13 March 2020

**Table S1** - Total amount of DNA and RNA per gram of soil in Miers and Beacon Valley soils for each treatment and for each time point.

| Sample ID | Valley | Treatment       | Days | DNA (ng/g soil)                              | Total RNA (ng/g soil)                       |
|-----------|--------|-----------------|------|----------------------------------------------|---------------------------------------------|
| 5M        | Miers  | Control         | 1    | 241                                          | 52                                          |
| 6M        | Miers  | Control         | 28   | 273                                          | 37                                          |
| 7M        | Miers  | Control         | 68   | <i>Below detection limit (&lt;0.5 ng/mL)</i> | 39                                          |
| 9M        | Miers  | Cu              | 1    | 418                                          | <i>Below detection limit (&lt;20 ng/mL)</i> |
| 10M       | Miers  | Cu              | 28   | 196                                          | 119                                         |
| 11M       | Miers  | Cu              | 68   | 355                                          | 106                                         |
| 13M       | Miers  | NaCl            | 1    | 850                                          | 99                                          |
| 14M       | Miers  | NaCl            | 28   | 712                                          | 53                                          |
| 15M       | Miers  | NaCl            | 68   | 154                                          | 69                                          |
| 17M       | Miers  | Glucose         | 1    | 822                                          | 44                                          |
| 18M       | Miers  | Glucose         | 28   | 458                                          | 77                                          |
| 20M       | Miers  | Glucose         | 68   | 307                                          | 143                                         |
| 21M       | Miers  | NH <sub>4</sub> | 1    | 185                                          | 124                                         |
| 22M       | Miers  | NH <sub>4</sub> | 28   | 193                                          | 171                                         |
| 23M       | Miers  | NH <sub>4</sub> | 68   | 333                                          | 159                                         |
| 5B        | Beacon | Control         | 1    | 185                                          | <i>Below detection limit (&lt;20 ng/mL)</i> |
| 6B        | Beacon | Control         | 28   | 163                                          | <i>Below detection limit</i>                |

|     |        |                 |    |     |  |                                                 |
|-----|--------|-----------------|----|-----|--|-------------------------------------------------|
|     |        |                 |    |     |  | ( $<20$ ng/mL )                                 |
| 7B  | Beacon | Control         | 65 | 81  |  | 13                                              |
| 9B  | Beacon | Cu              | 1  | 186 |  | <i>Below detection limit</i><br>( $<20$ ng/mL ) |
| 10B | Beacon | Cu              | 28 | 254 |  | <i>Below detection limit</i><br>( $<20$ ng/mL ) |
| 11B | Beacon | Cu              | 65 | 165 |  | 4                                               |
| 13B | Beacon | NaCl            | 1  | 114 |  | <i>Below detection limit</i><br>( $<20$ ng/mL ) |
| 14B | Beacon | NaCl            | 28 | 335 |  | <i>Below detection limit</i><br>( $<20$ ng/mL ) |
| 15B | Beacon | NaCl            | 65 | 54  |  | <i>Below detection limit</i><br>( $<20$ ng/mL ) |
| 17B | Beacon | Glucose         | 1  | 154 |  | <i>Below detection limit</i><br>( $<20$ ng/mL ) |
| 18B | Beacon | Glucose         | 28 | 238 |  | <i>Below detection limit</i><br>( $<20$ ng/mL ) |
| 19B | Beacon | Glucose         | 65 | 50  |  | <i>Below detection limit</i><br>( $<20$ ng/mL ) |
| 21B | Beacon | NH <sub>4</sub> | 1  | 651 |  | <i>Below detection limit</i><br>( $<20$ ng/mL ) |
| 22B | Beacon | NH <sub>4</sub> | 28 | 173 |  | <i>Below detection limit</i><br>( $<20$ ng/mL ) |
| 23B | Beacon | NH <sub>4</sub> | 65 | 91  |  | 27                                              |

**Table S2** – Concentration ( $\mu$ M) of inorganic N compounds in Miers valley soils during the manipulative experiment.

| Miers Treatment | Time (days) | NH <sub>4</sub> <sup>+</sup> ( $\mu$ M) | sd    | NO <sub>3</sub> <sup>-</sup> ( $\mu$ M) | sd   | NO <sub>2</sub> <sup>-</sup> ( $\mu$ M) | sd   |
|-----------------|-------------|-----------------------------------------|-------|-----------------------------------------|------|-----------------------------------------|------|
| Control         | 1           | 15.12                                   | 0.58  | 5.28                                    | 0.30 | 3.89                                    | 0.03 |
| Control         | 28          | 79.74                                   | 0.53  | 8.81                                    | 0.06 | 4.28                                    | 0.00 |
| Control         | 68          | 77.66                                   | 0.97  | 27.22                                   | 0.12 | 4.01                                    | 0.00 |
| Cu              | 1           | 13.96                                   | 1.55  | 4.87                                    | 0.42 | 4.01                                    | 0.03 |
| Cu              | 28          | 39.62                                   | 0.97  | 9.39                                    | 0.36 | 3.49                                    | 0.02 |
| Cu              | 68          | 112.55                                  | 2.13  | 25.38                                   | 0.48 | 3.94                                    | 0.08 |
| NaCl            | 1           | 11.94                                   | 0.53  | 3.81                                    | 0.29 | 3.19                                    | 0.21 |
| NaCl            | 28          | 30.38                                   | 0.48  | 8.58                                    | 0.39 | 4.11                                    | 0.34 |
| NaCl            | 68          | 62.67                                   | 0.77  | 30.80                                   | 0.29 | 4.27                                    | 0.10 |
| Glucose         | 1           | 14.61                                   | 2.27  | 2.45                                    | 0.18 | 4.32                                    | 0.05 |
| Glucose         | 28          | 70.81                                   | 0.29  | 9.14                                    | 0.03 | 3.05                                    | 0.06 |
| Glucose         | 68          | 80.15                                   | 13.69 | 28.16                                   | 0.15 | 4.05                                    | 0.03 |
| NH <sub>4</sub> | 1           | 16.18                                   | 0.34  | 4.82                                    | 0.03 | 4.08                                    | 0.00 |
| NH <sub>4</sub> | 28          | 45.90                                   | 0.04  | 8.68                                    | 0.03 | 2.61                                    | 0.03 |
| NH <sub>4</sub> | 68          | 103.76                                  | 5.66  | 42.29                                   | 0.03 | 4.01                                    | 0.00 |

**Table S3**– Concentration ( $\mu\text{M}$ ) of inorganic N compounds in Beacon valley soils during the manipulative experiment.

| Beacon Treatment | Time (days) | $\text{NH}_4^+$ ( $\mu\text{M}$ ) | sd   | $\text{NO}_3^-$ ( $\mu\text{M}$ ) | sd   | $\text{NO}_2^-$ ( $\mu\text{M}$ ) | sd   |
|------------------|-------------|-----------------------------------|------|-----------------------------------|------|-----------------------------------|------|
| Control          | 1           | 7.40                              | 0.16 | 47.65                             | 0.70 | 4.26                              | 0.07 |
| Control          | 28          | 14.80                             | 0.49 | 56.26                             | 0.03 | 3.91                              | 0.02 |
| Control          | 65          | 37.62                             | 0.45 | 51.93                             | 1.01 | 4.18                              | 0.05 |
| Cu               | 1           | 5.00                              | 0.45 | -                                 | -    | -                                 | -    |
| Cu               | 28          | 13.04                             | 0.12 | 57.21                             | 1.87 | 4.39                              | 0.05 |
| Cu               | 65          | 22.84                             | 0.16 | 49.67                             | 0.37 | 4.16                              | 0.10 |
| NaCl             | 1           | 5.45                              | 0.73 | 46.26                             | 0.31 | 3.69                              | 0.03 |
| NaCl             | 28          | 10.35                             | 0.08 | 53.29                             | 0.06 | 4.09                              | 0.03 |
| NaCl             | 65          | 20.88                             | 0.08 | 52.88                             | 0.49 | 4.03                              | 0.05 |
| Glucose          | 1           | 6.94                              | 0.41 | 51.24                             | 0.52 | 3.86                              | 0.00 |
| Glucose          | 28          | 7.44                              | 0.08 | 69.17                             | 4.10 | 3.83                              | 0.05 |
| Glucose          | 65          | 40.80                             | 1.59 | 50.57                             | 0.61 | 4.18                              | 0.05 |
| $\text{NH}_4$    | 1           | 5.62                              | 0.19 | 50.60                             | 0.39 | 3.86                              | 0.07 |
| $\text{NH}_4$    | 28          | 15.17                             | 0.23 | 66.61                             | 0.52 | 3.95                              | 0.02 |
| $\text{NH}_4$    | 65          | 39.57                             | 0.08 | 50.14                             | 0.15 | 4.15                              | 0.08 |

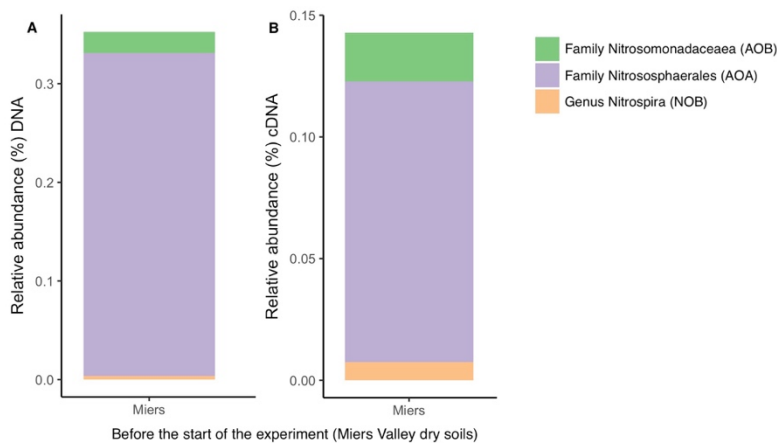

**Figure S1** – Relative abundance (%) of 16S rRNA gene sequences (A) and transcripts (B) assigned to taxonomically identified nitrifying microorganisms (AOA – ammonia-oxidizing archaea; AOB – ammonia-oxidizing bacteria; NOB – nitrite-oxidizing bacteria) before the start of the manipulative experiment in Miers Valley soils.
